# Supplementary material
Source: Springer Nature journal article supplement (https://www.springermedizin.de/resource/supplementary/12916_2010_297_MOESM1_ESM.pdf/9599578)
Supplement: MOESM1 [file 9599578]

Potentially relevant references identified and screened for retrieval ( $n=38000$ )

Excluded on the basis of title and abstract because clearly not relevant ( $n=37241$ )

References retrieved for more detailed evaluation ( $n=759$ )

Excluded ( $n=721$ ):  
Not meeting inclusion criteria ( $n=705$ )  
Further reports of an included study ( $n=16$ )

Studies of psychological therapies in primary care ( $n=38$ )

Excluded as psychological therapy was ten sessions or more ( $n=4$ )

Included studies ( $n=34$ )
